# Supplementary material
Source: PubMed Central journal article supplement (PMC2676922)
Supplement: NIHMS96889-supplement-supplemental_d.pdf [file NIHMS96889-supplement-supplemental_d.pdf]

## SUPPLEMENTAL DATA

**Fig. S1.** Two dimensional acrylamide gel of a mixture of secreted proteins from B35, B50, B103, and B104 nerve-like rat CNS cell lines, 75 µg of each. The majority of the proteins in the gel were identified by LC/MS and are listed in Table S1 along with the other secreted proteins identified in this manuscript.

**Fig. S2.** Two dimensional acrylamide gel of proteins secreted by AHP cells.

**Fig. S3.** Western blots of four secreted proteins from four different cell types confirm LC/MS protein identification. Ten micrograms of secreted protein from each cell line were run on 12% SDS acrylamide gels and blotted with the indicated antisera.

**Table S1.** Table of secreted proteins. All of the identified proteins in this study are listed, roughly starting with the low molecular weight proteins determined in Fig. S1, the gels with a mixture of the secreted proteins from the CNS cell lines master mix. The proteins unique to the different cell types from Fig. 2 (cortical nerve and astrocyte) and AHP (Fig. S2) follow in the right hand columns. Each protein is assigned an accession number and theoretical molecular weight. The probability based Mowse score determined by the Mascot search algorithm is listed. Scores >40 are considered as being significant. However, each protein spot in this table has been identified by LC/MS at least three times in the same position on the gels from three independent experiments. A +\* indicates the protein was detected and identified in the B35, B50, B103, B104 master mix and identified again by LC/MS when the secreted proteins from the individual cell lines were run. Otherwise in the case of B35, B50, B103 and B104 the proteins were identified by spot location. All of the proteins from AHP, astrocytes (Astro) and cortical nerve (nerve) were identified independently at least three times by LC/MS and, in addition, by matching the spot position to the master mix when possible.

**Table S2.** Table of secreted proteins grouped according to known biological function.

Figure S1

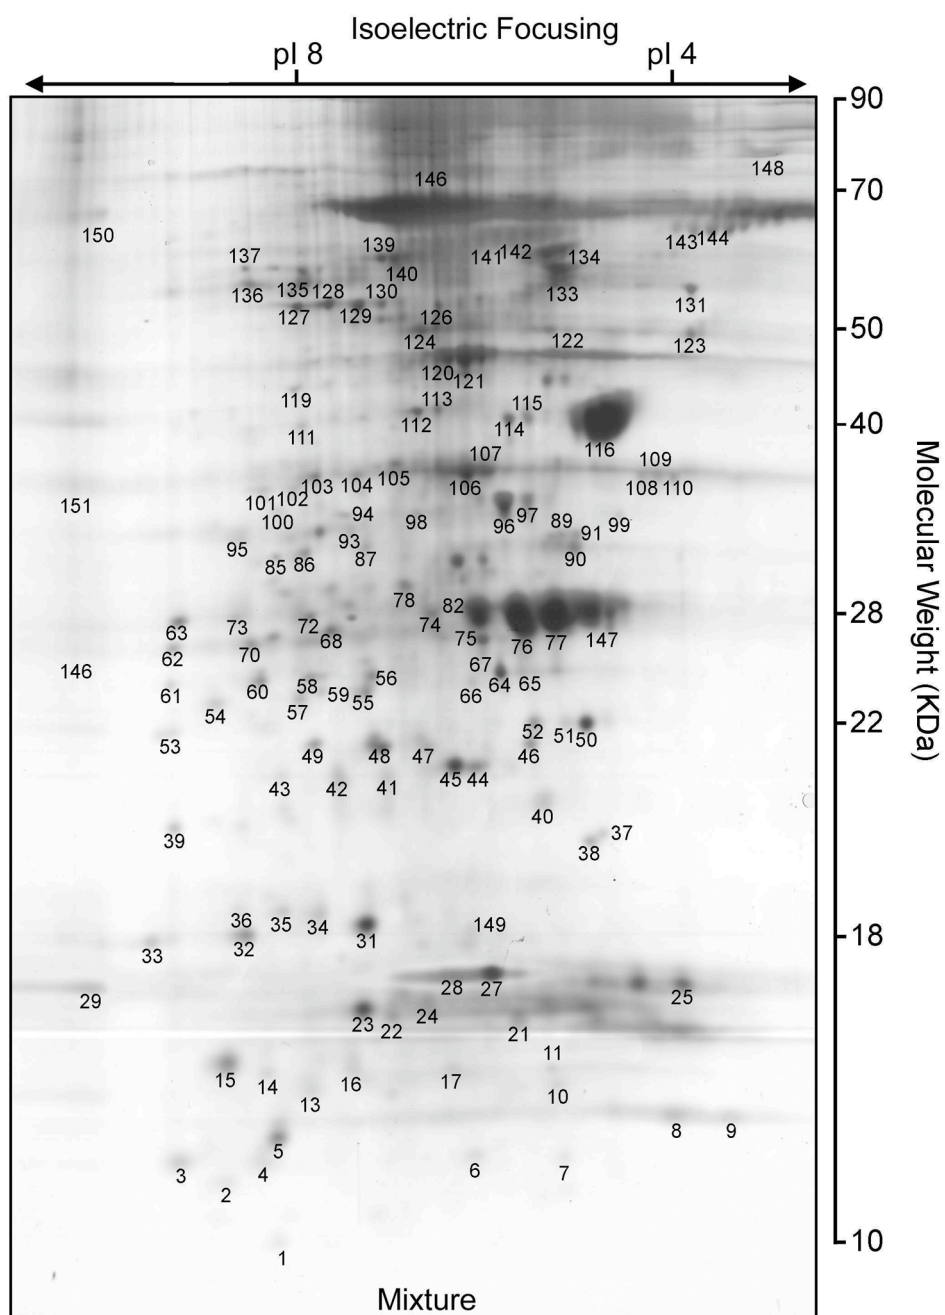

Figure S2

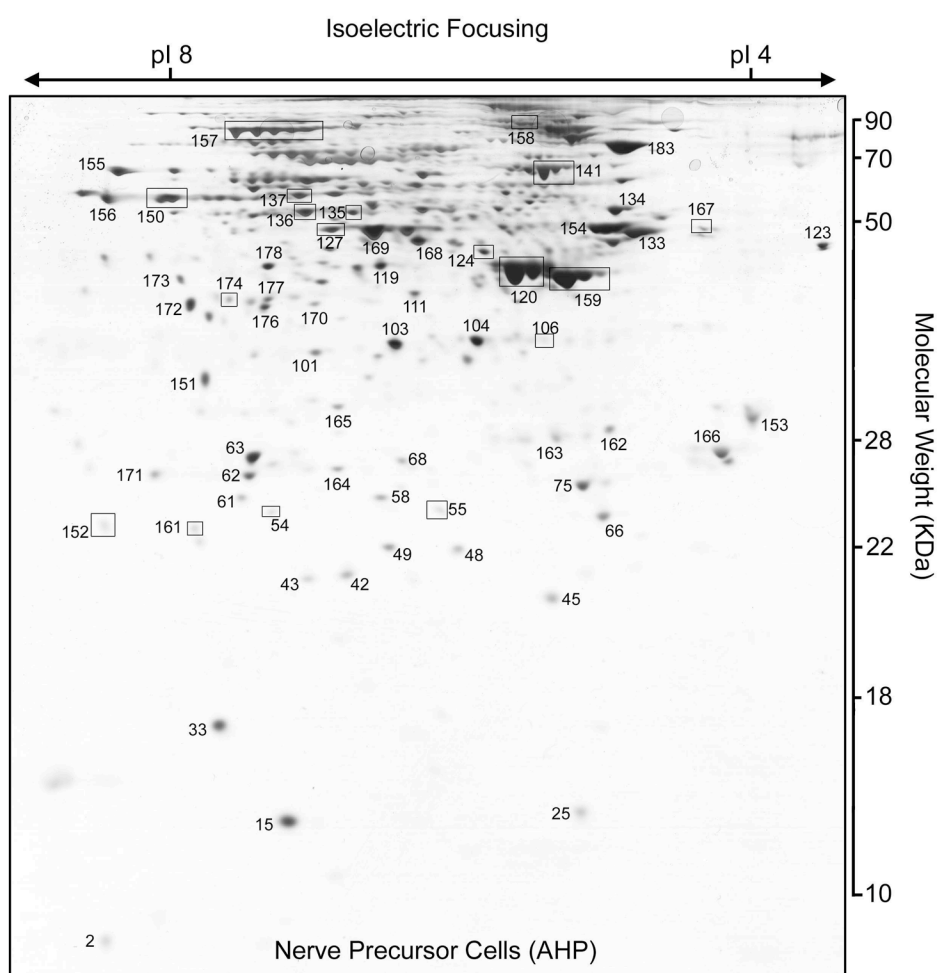

Figure S3

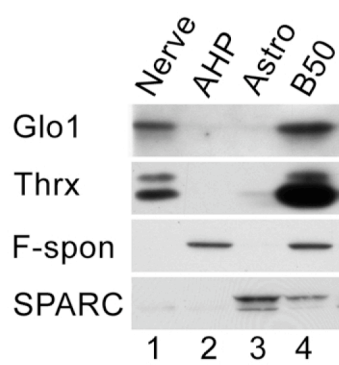

**TABLE S1: COMPLETE LIST OF SECRETED PROTEINS**

| Spot No. | Protein Name                                          | Accession Number | Theor. MW (kDa) | Score | Peptides | Master Mix |     |      |      | AHP | Astro | Nerve |
|----------|-------------------------------------------------------|------------------|-----------------|-------|----------|------------|-----|------|------|-----|-------|-------|
|          |                                                       |                  |                 |       |          | B35        | B50 | B103 | B104 |     |       |       |
| 1        | Nedd 8                                                | 13435504         | 8,967           | 208   | 45       | +          | +   | +    | +    | o   | o     | o     |
| 2        | Macrophage migration inhibitory factor beta chain (a) | 5542287          | 12,365          | 210   | 2        | +          | +   | o    | o    | +   | o     | +     |
| 3        | Macrophage migration inhibitory factor beta chain (b) | 5542287          | 12,365          | 74    | 2        | +          | +   | +    | +    | o   | o     | o     |
| 4        | Macrophage migration inhibitory factor beta chain (c) | 5542287          | 12,365          | 150   | 3        | +          | +   | o    | +    | o   | o     | o     |
| 5        | D-dopachrome decarboxylase                            | 6753618          | 13,069          | 96    | 4        | +          | +   | +    | +    | o   | o     | o     |
| 6        | GAPDH (12 kd frag)                                    | 63556808         | 41,160          | 44    | 2        | +          | +   | +    | +    | o   | o     | o     |
| 7        | Parathyrosin                                          | 18204145         | 11,762          | 42    | 1        | +          | +   | +    | o    | o   | o     | o     |
| 8        | Reticulon 4                                           | 56207523         | 12,480          | 104   | 3        | +          | +   | +    | o    | o   | o     | o     |
| 9        | Thioredoxin 1 (a)                                     | 6755911          | 11,388          | 130   | 3        | +          | +   | +    | +    | o   | o     | o     |
| 10       | Thioredoxin 1 (b)                                     | 6755911          | 11,668          | 59    | 2        | +          | +   | +    | +    | o   | o     | +     |
| 11       | Coactosin-like protein (a)                            | 16307409         | 11,189          | 69    | 7        | +          | +   | +    | +    | o   | o     | o     |
| 13       | Profilin 1                                            | 1628436          | 14,978          | 105   | 4        | +          | +   | +    | +    | o   | o     | o     |
| 14       | Histidine triad nucleotide binding protein 1          | 33468857         | 13,768          | 51    | 1        | +          | +   | +    | +    | o   | o     | o     |
| 15       | Fatty acid binding protein 5                          | 6754450          | 15,127          | 101   | 3        | +          | +   | +    | +    | +   | o     | +     |
| 16       | Histone H2A.1                                         | 51304            | 14,153          | 153   | 5        | +          | +   | +    | o    | o   | o     | o     |
| 17       | Profilin 2                                            | 9506971          | 15,022          | 66    | 1        | +          | +   | +    | +    | o   | o     | o     |
| 21       | Coactosin-like protein 1 (b)                          | 1628436          | 11,189          | 80    | 3        | +          | +   | o    | o    | o   | o     | o     |
| 22       | Histone H2B                                           | 280961           | 15,099          | 137   | 6        | +          | +   | +    | +    | o   | o     | o     |
| 23       | Ubiquitin - conjugating enzyme E2N                    | 12838544         | 17,171          | 97    | 3        | +          | +   | +    | +    | o   | o     | o     |
| 24       | Histone H2B (b)                                       | 280961           | 15,009          | 189   | 6        | +          | +   | +    | +    | o   | o     | o     |
| 25       | Guanine nucleotide BP B2                              | 56800239         | 16,322          | 128   | 2        | +          | +   | +    | +    | +   | o     | o     |
| 27       | N-cadherin-2 precursor (16 kd frag)                   | 6680902          | 99,699          | 216   | 8        | +          | +   | +    | +    | o   | o     | o     |
| 28       | N-cadherin-2 precursor (16 kd frag)                   | 6680902          | 99,699          | 59    | 3        | +          | +   | o    | o    | o   | o     | o     |
| 29       | Peptidylprolylisomerase C                             | 1000036          | 17,960          | 103   | 4        | o          | +   | +    | +    | +   | o     | o     |
| 31       | Tumor metastatic protein NM 23 (a)                    | 387496           | 18,072          | 128   | 8        | +          | +   | +    | +    | o   | o     | +     |
| 32       | NM 23 (b)                                             | 387496           | 18,672          | 155   | 10       | o          | o   | +    | +    | o   | o     | o     |
| 33       | Expressed in non-metastatic cell protein 1            | 56800494         | 17,197          | 197   | 20       | +          | +   | +    | +    | +   | o     | +     |
| 34       | Cofilin 1, nonmuscle (a)                              | 6880924          | 18,548          | 168   | 4        | o          | +   | +    | +    | o   | o     | o     |
| 35       | Cofilin 1, nonmuscle (b)                              | 6880924          | 18,548          | 144   | 3        | o          | +   | +    | +    | o   | o     | o     |
| 36       | NM 23 (c)                                             | 387496           | 18,072          | 177   | 9        | o          | +   | +    | +    | o   | +     | o     |
| 37       | Vimentin (15 kd frag)                                 | 55291            | 53,641          | 280   | 11       | o          | +   | +    | +    | o   | o     | o     |
| 38       | Vimentin (15 kd frag)                                 | 55291            | 53,641          | 75    | 2        | +          | +   | +    | +    | o   | o     | o     |
| 39       | Cyclophilin C                                         | 1000036          | 19,904          | 51    | 2        | +          | +   | +    | +    | o   |       | o     |
| 40       | Peroxiredoxin 2 (a)                                   | 1568575          | 21,765          | 274   | 86       | o          | +   | +    | +    | +   | o     | +     |
| 41       | NM 23 (d)                                             | 387496           | 18,672          | 78    | 3        | o          | o   | +    | +    | o   | o     | o     |
| 42       | NM 23 (e)                                             | 387496           | 18,672          | 121   | 4        | o          | +   | +    | +    | +   | +     | o     |
| 43       | NM 23 (f)                                             | 387496           | 18,672          | 144   | 3        | o          | +   | +    | +    | +   | +     | o     |
| 44       | Peroxiredoxin 2 (b)                                   | 1568575          | 21,765          | 194   | 15       | +          | +   | +    | +    | +   | o     | o     |
| 45       | Phosphatidyl ethanolamine BP                          | 92565972         | 20,787          | 144   | 5        | +          | +   | +    | +    | +   | +     | o     |
| 46       | Methylglyoxylase 1                                    | 31981282         | 20,826          | 59    | 2        | +          | +   | +    | +    | o   | o     | +     |
| 47       | Heparan sulfate proteoglycan 2 (frag)                 | 55715901         | 117,786         | 106   | 3        | +          | +   | +    | +    | +   | o     | o     |
| 48       | Peroxiredoxin 2 (c)                                   | 1568575          | 21,765          | 100   | 3        | +          | +   | +    | +    | +   | o     | o     |
| 49       | DJ1                                                   | 55741460         | 20,008          | 48    | 2        | +          | +   | +    | +    | +   | o     | +     |
| 50       | Huntingtin interacting protein                        | 2897818          | 22,389          | 91    | 3        | +          | +   | +    | +    | o   | o     | o     |
| 51       | p22 phox                                              | 26354020         | 20,030          | 85    | 6        | o          | +   | +    | +    | o   | o     | o     |
| 52       | Proteasome beta-6                                     | 984938           | 21,668          | 236   | 9        | +          | +   | +    | +    | o   | o     | o     |
| 53       | Peroxiredoxin 2 (d)                                   | 1568575          | 22,162          | 133   | 5        | +          | o   | +    | +    | +   | o     | +     |
| 54       | GST Yfyf chain B (a)                                  | 2624496          | 23,350          | 50    | 1        | +          | +   | +    | +    | o   | o     | o     |
| 55       | GST - P2 (a)                                          | 32401425         | 23,552          | 106   | 2        | +          | +   | +    | +    | +   | o     | o     |
| 56       | Peroxiredoxin 6                                       | 2072655          | 24,855          | 124   | 4        | +          | +   | +    | +    | +   | o     | o     |
| 57       | GST Yfyf chain B (b)                                  | 2624496          | 23,350          | 130   | 2        | +          | +   | +    | +    | o   | o     | o     |
| 58       | Proteasome beta 3                                     | 83944082         | 22,949          | 116   | 2        | +          | +   | +    | +    | +   | o     | +     |
| 60       | Proteasome alpha type 5                               | 6679497          | 25,909          | 68    | 2        | +          | +   | +    | +    | o   | o     | o     |
| 61       | Proteasome alpha type 2                               | 6679497          | 25,909          | 71    | 3        | +          | +   | +    | +    | +   | o     | +     |
| 62       | Triosephosphate isomerase (a)                         | 54855            | 26,679          | 162   | 5        | +          | +   | +    | +    | +   | o     | +     |
| 63       | Pyroline-5-carboxylate reductase                      | 13384800         | 26,153          | 56    | 1        | +          | +   | +    | +    | +   | +     | +     |
| 64       | Rho GDP dissociation inhibitor                        | 55742827         | 23,393          | 186   | 7        | +          | +   | +    | +    | o   | o     | o     |
| 65       | GST Yfyf chain B                                      | 2624496          | 23,350          | 49    | 1        | +          | +   | +    | +    | o   | o     | o     |
| 66       | HS 27                                                 | 547679           | 22,879          | 204   | 10       | o          | o   | +    | +    | +   | o     | o     |
| 67       | LI                                                    | 6755929          | 24,822          | 62    | 4        | +          | +   | +    | +    | o   | o     | o     |
| 68       | ER p29 (a)                                            | 19526463         | 28,805          | 171   | 7        | +          | +   | +    | +    | +   | o     | o     |
| 70       | Triosephosphate isomerase 1 (b)                       | 54855            | 26,679          | 162   | 5        | +          | +   | +    | +    | o   | o     | o     |
| 72       | ER p29 (b)                                            | 19526463         | 28,805          | 78    | 2        | +          | +   | +    | +    | o   | o     | o     |
| 73       | Heat Shock 8                                          | 63664182         | 33,101          | 74    | 2        | +          | +   | +    | +    | +   | +     | +     |
| 74       | ER p29 (c)                                            | 19526463         | 28,805          | 66    | 3        | +          | +   | +    | +    | o   | o     | o     |
| 75       | Tyrosine hydroxylase (a)                              | 31981925         | 29,170          | 314   | 17       | +          | +   | +    | +    | +   | o     | +     |
| 76       | 14-3-3 gamma (a)                                      | 3065929          | 27,000          | 193   | 7        | +          | +   | +    | +    | o   | o     | o     |
| 77       | 14-3-3 gamma (b)                                      | 3065929          | 27,000          | 104   | 5        | +          | +   | +    | +    | o   | o     | o     |
| 78       | Dimethyl arginine hydroxylase 2                       | 7949035          | 25,352          | 164   | 7        | +          | +   | +    | +    | o   | +     | +     |
| 82       | 14-3-3 gamma (c)                                      | 3065929          | 27,000          | 120   | 5        | +          | +   | +    | +    | o   | o     | o     |
| 85       | Proteasome alpha 1                                    | 38328483         | 29,499          | 500   | 69       | +          | o   | +    | +    | o   | o     | +     |
| 86       | Glucose regulated protein (frag) (a)                  | 2506545          | 72,412          | 320   |          | +          | +   | +    | +    | o   | o     | o     |
| 87       | Fibrillin 1 precursor (frag)                          | 3913647          | 312,025         | 163   |          | +          | +   | +    | +    | o   | o     | o     |
| 89       | Tyrosine hydroxylase (b)                              | 31981925         | 29,170          | 58    | 2        | o          | o   | +    | +    | o   | o     | o     |
| 90       | Tyrosine hydroxylase (c)                              | 31981925         | 29,170          | 219   | 7        | o          | +   | +    | +    | +   | o     | o     |
| 91       | HS 70 (frag)                                          | 1661134          | 70,793          | 59    | 1        | o          | o   | +    | +    | o   | o     | o     |
| 95       | Pirin                                                 | 57164095         | 32,158          | 325   | 20       | o          | +   | +    | +    | o   | o     | o     |
| 96       | Pro-collagen XII alpha 1 (a)                          | 111074529        | 35,209          | 89    |          | +          | o   | +    | +    | o   | o     | +     |
| 97       | Pro-collagen XII alpha 1 (b)                          | 111074529        | 35,209          | 250   |          | +          | o   | +    | +    | o   | o     | o     |
| 98       | Alpha dystroglycan 1 (frag) (a)                       | 1587060          | 70,537          | 67    | 3        | o          | +   | +    | +    | +   | o     | o     |
| 99       | Proliferating cell nuclear antigen                    | 7242171          | 28,766          | 213   | 8        | o          | o   | +    | +    | o   | o     | o     |
| 100      | Collagen type 1, alpha 2 (frag)                       | 16758080         | 41,160          | 58    | 2        | +          | o   | +    | +    | o   | o     | o     |
| 101      | GAPDH                                                 | 120702           | 35,804          | 80    | 4        | +          | o   | +    | +    | +   | +     | +     |
| 102      | Aldose reductase                                      | 55759            | 35,774          | 429   | 50       | +          | o   | +    | +    | o   | +     | +     |
| 103      | Malic dehydrogenase                                   | 14152            | 63,999          | 78    | 5        | o          | +   | +    | +    | +   | +     | +     |
| 104      | LDH chain M (a)                                       | 65923            | 36,474          | 60    | 1        | o          | +   | +    | +    | +   | o     | +     |
| 105      | LDH chain B                                           | 6678674          | 36,549          | 143   | 4        | +          | +   | +    | +    | o   | o     | o     |

| Spot No. | Protein Name                                  | Accession Number | Theor. MW (kDa) | Score | Peptides | Master Mix |     |      |      |   | AHP | Astro | Nerve |
|----------|-----------------------------------------------|------------------|-----------------|-------|----------|------------|-----|------|------|---|-----|-------|-------|
|          |                                               |                  |                 |       |          | B35        | B50 | B103 | B104 |   |     |       |       |
| 106      | LDH chain M (b)                               | 65923            | 36,474          | 54    | 4        | +          | +   | +    | +    | + | +   | +     | o     |
| 107      | Alpha dystroglycan (frag) (b)                 | 1587060          | 70,537          | 74    | 2        | +          | o   | +    | +    | o | o   | o     | o     |
| 108      | LDH-A (a)                                     | 8393706          | 36,427          | 100   | 5        | o          | +   | o    | +    | o | o   | o     | o     |
| 109      | LDH-A (b)                                     | 8393706          | 36,427          | 129   | 6        | o          | +   | o    | +    | o | o   | o     | o     |
| 110      | LDH-X                                         | 2117461          | 35,664          | 61    | 2        | o          | +   | o    | +    | o | o   | o     | o     |
| 111      | Transaldolase                                 | 33859640         | 37,363          | 158   | 8        | o          | +   | o    | +    | + | o   | +     | +     |
| 112      | Enolase alpha (a)                             | 50926833         | 47,098          | 54    | 2        | +          | +   | +    | +    | + | o   | o     | o     |
| 113      | Enolase alpha (b)                             | 50926833         | 47,098          | 440   | 13       | o          | o   | +    | +    | o | o   | o     | o     |
| 114      | Cathepsin L (a)                               | 44870022         | 37,505          | 125   | 3        | +          | +   | +    | +    | o | o   | o     | o     |
| 115      | Cathepsin L (b)                               | 44870022         | 37,505          | 115   | 2        | +          | +   | +    | +    | o | o   | o     | o     |
| 116      | Secreted acidic cysteine rich protein         | 6678077          | 34,428          | 255   | 8        | +          | +   | +    | +    | o | +   | +     | o     |
| 119      | Phosphoglycerate kinase 1                     | 6679291          | 44,508          | 79    | 3        | +          | +   | +    | +    | + | o   | o     | o     |
| 120      | gamma-actin (a)                               | 4885049          | 40,992          | 152   | 7        | +          | +   | +    | +    | + | o   | o     | o     |
| 121      | gamma-actin (b)                               | 4885049          | 40,992          | 42    | 4        | +          | +   | +    | +    | o | o   | o     | o     |
| 122      | gamma-actin (c)                               | 4885049          | 40,992          | 83    | 4        | o          | +   | +    | +    | o | o   | o     | o     |
| 123      | Creatine kinase (a)                           | 10946574         | 42,686          | 540   | 25       | o          | +   | +    | o    | + | o   | o     | o     |
| 124      | Creatine kinase (b)                           | 10946574         | 42,686          | 409   | 4        | +          | +   | +    | +    | + | +   | +     | +     |
| 126      | Pigment epithelium-derived factor             | 2961482          | 46,175          | 107   | 2        | +          | +   | +    | +    | o | o   | o     | o     |
| 127      | Enolase 1alpha (a)                            | 12963491         | 47,095          | 171   | 6        | +          | +   | +    | +    | + | +   | +     | o     |
| 128      | Enolase 1alpha (b)                            | 12963491         | 47,095          | 210   | 5        | +          | +   | +    | +    | o | o   | o     | o     |
| 129      | Enolase 1alpha (c)                            | 12963491         | 47,095          | 248   | 7        | +          | +   | +    | +    | o | o   | o     | o     |
| 130      | Enolase 1alpha (d)                            | 12963491         | 47,095          | 138   | 4        | +          | +   | +    | +    | o | o   | o     | o     |
| 131      | Calreticulin precursor                        | 436046           | 47,065          | 118   | 3        | +          | +   | +    | +    | o | o   | o     | o     |
| 133      | Prolyl-4-hydroxylase beta                     | 54777            | 57,108          | 201   | 9        | +          | +   | +    | +    | + | o   | +     | +     |
| 134      | Heat shock 70 (HS70) (a)                      | 1661134          | 70,934          | 410   | 25       | +          | +   | +    | +    | + | +   | +     | +     |
| 135      | Procollagen C-proteinase enhancer protein (a) | 9506953          | 50,153          | 496   | 31       | +          | +   | +    | +    | + | +   | +     | o     |
| 136      | Procollagen C-proteinase enhancer protein (b) | 9506953          | 50,153          | 513   | 48       | +          | +   | +    | +    | + | o   | +     | o     |
| 137      | Dihydropyrimidinase 3 (frag)                  | 21666559         | 738,530         | 162   | 5        | +          | +   | +    | +    | + | +   | +     | +     |
| 139      | Nucleobindin 1 (a)                            | 6679158          | 53,362          | 54    | 2        | +          | +   | +    | +    | o | o   | o     | o     |
| 140      | Nucleobindin 1 (b)                            | 6679158          | 53,362          | 98    | 3        | +          | +   | +    | +    | o | o   | o     | o     |
| 141      | HS 70 (b)                                     | 1661134          | 70,934          | 655   | 33       | +          | +   | +    | +    | + | +   | +     | +     |
| 142      | HS 70 (c)                                     | 1661134          | 70,934          | 433   | 27       | +          | +   | +    | +    | o | o   | o     | o     |
| 143      | Nucleobindin 1 (c)                            | 6679158          | 53,362          | 196   | 6        | +          | +   | +    | +    | o | o   | o     | o     |
| 144      | Nucleobindin 1 (d)                            | 6679158          | 53,362          | 69    | 2        | +          | +   | +    | +    | o | o   | o     | o     |
| 146      | Triosephosphate isomerase (c)                 | 19526463         | 26,679          | 162   | 6        | +          | +   | +    | +    | + | +   | +     | o     |
| 147      | 14-3-3 gamma (d)                              | 3065929          | 27,000          | 104   | 5        | +          | +   | o    | +    | + | o   | o     | o     |
| 148      | N-Cadherin (frag)                             | 6680902          | 99,734          | 157   | 6        | o          | +   | +    | +    | + | o   | o     | o     |
| 149      | Glial maturation factor beta                  | 108869743        | 16,723          | 129   | 7        | o          | o   | o    | +    | o | o   | o     | o     |
| 150      | M2 pyruvate kinase                            | 1675994          | 57,744          | 509   | 16       | +          | o   | o    | +    | o | o   | +     | +     |
| 151      | Lamin receptor 1                              | 31560560         | 32,698          | 120   | 3        | +          | o   | o    | +    | + | o   | +     | +     |
| 152      | GST-p12 (b)                                   | 25453412         | 23,424          | 434   | 27       | o          | +   | o    | o    | + | o   | o     | o     |
| 154      | Tubulin alpha 3                               | 90217            | 50,064          | 597   | 77       | o          | o   | o    | o    | + | o   | o     | o     |
| 155      | Thioredoxin reductase 1                       | 5410338          | 54,250          | 324   | 47       | o          | o   | o    | o    | + | o   | +     | +     |
| 156      | Transketolase                                 | 12018252         | 71,141          | 616   | 76       | o          | o   | o    | o    | + | +   | +     | +     |
| 157      | Elongation factor 2                           | 600159           | 95,249          | 329   | 18       | o          | o   | o    | o    | + | +   | +     | +     |
| 158      | F-spondin                                     | 50510627         | 82,002          | 248   | 9        | o          | +   | o    | o    | + | o   | o     | o     |
| 159      | Beta actin                                    | 49868            | 39,161          | 295   | 19       | +          | o   | o    | o    | + | +   | +     | +     |
| 161      | GST YfyA                                      | 576133           | 23,463          | 220   | 18       | +          | o   | o    | +    | + | o   | o     | o     |
| 162      | Inositol phosphatase                          | 3914098          | 30,416          | 139   | 8        | +          | o   | o    | o    | + | o   | o     | o     |
| 163      | Proteasome alpha 3                            | 3914438          | 28,387          | 264   | 22       | o          | o   | o    | o    | + | o   | +     | +     |
| 164      | Presenilin-2                                  | 6755188          | 27,355          | 165   | 7        | +          | +   | +    | +    | + | o   | +     | +     |
| 165      | Phosphatidyl inositol transfer protein alpha  | 6679337          | 31,873          | 155   | 4        | +          | o   | +    | +    | + | o   | o     | o     |
| 166      | ER p29 (d)                                    | 19526463         | 28,805          | 171   | 7        | o          | +   | o    | o    | + | o   | o     | o     |
| 167      | Retinoblastoma binding protein                | 1016275          | 51,738          | 416   | 26       | o          | +   | +    | +    | o | +   | o     | o     |
| 168      | GDP dissociation inhibitor 1 (a)              | 40254781         | 50,505          | 631   | 63       | +          | o   | +    | +    | + | +   | +     | +     |
| 169      | LOC433182 protein                             | 53734652         | 50,209          | 800   | 128      | o          | o   | +    | +    | + | +   | +     | +     |
| 170      | Transaldolase                                 | 33859640         | 33,363          | 130   | 5        | o          | +   | o    | +    | + | o   | o     | o     |
| 171      | Triosephosphate isomerase 1 (b)               | 54855            | 26,696          | 162   | 5        | +          | +   | o    | +    | + | o   | o     | o     |
| 172      | Aldolase 3                                    | 14198249         | 39,307          | 145   | 4        | o          | +   | o    | +    | + | o   | +     | +     |
| 173      | Aspartate aminotransferase (a)                | 871422           | 46,203          | 154   | 11       | o          | o   | o    | +    | + | o   | +     | +     |
| 174      | Aspartate aminotransferase (b)                | 811422           | 46,203          | 154   | 11       | o          | o   | o    | o    | + | o   | +     | +     |
| 176      | Alpha fetoprotein (a)                         | 191765           | 47,195          | 81    | 2        | o          | +   | o    | +    | + | o   | o     | o     |
| 177      | Alpha fetoprotein (b)                         | 191765           | 47,195          | 84    | 14       | o          | o   | o    | o    | + | +   | o     | o     |
| 178      | Dihydropyridinase-2                           | 40254595         | 62,239          | 446   | 25       | o          | o   | o    | o    | + | o   | +     | +     |
| 179      | Proteasome alpha 4                            | 6755196          | 29,452          | 273   | 11       | o          | o   | o    | o    | o | o   | +     | +     |
| 180      | Serine protease 27                            | 94382825         | 59,818          | 69    | 8        | o          | +   | o    | +    | + | o   | o     | +     |
| 181      | Platelet-activating factor acetylhydrolase    | 7505363          | 46,640          | 203   | 9        | o          | o   | o    | o    | o | o   | +     | +     |
| 182      | Glucose-regulated protein precursor (b)       | 2506545          | 72,377          | 1178  | 47       | o          | o   | +    | +    | o | +   | +     | +     |
| 183      | HS 90                                         | 40556608         | 83,229          | 1045  | 33       | o          | o   | +    | +    | o | +   | +     | +     |
| 184      | ER ATPase p97                                 | 94408011         | 88,796          | 1336  | 56       | o          | o   | o    | o    | o | o   | +     | +     |
| 185      | Follistatin related protein 7                 | 2498391          | 34,516          | 90    | 8        | o          | o   | o    | o    | o | +   | o     | o     |
| 186      | Nonmuscle alpha tropomyosin                   | 207351           | 32,711          | 558   | 33       | o          | o   | o    | o    | o | +   | +     | o     |
| 187      | Procollagen type 3 (frag) (a)                 | 57916            | 62,293          | 317   | 33       | o          | o   | o    | o    | o | +   | o     | o     |
| 188      | Procollagen type 1, alpha 2 (frag) (a)        | 16758080         | 129,486         | 349   | 70       | o          | o   | o    | o    | o | +   | o     | o     |
| 189      | Procollagen type 1, alpha 2 (frag) (b)        | 16758080         | 129,486         | 92    | 7        | o          | o   | o    | o    | o | +   | o     | o     |
| 190      | Procollagen type 1, alpha 2 (frag) (c)        | 16758080         | 129,486         | 119   | 3        | o          | o   | o    | o    | o | +   | o     | o     |
| 191      | Procollagen type 1, alpha 2 (frag) (d)        | 16758080         | 129,486         | 210   | 28       | o          | o   | o    | o    | o | +   | o     | o     |
| 192      | Lumican (proteoglycan)                        | 13591983         | 38,255          | 282   | 20       | o          | o   | o    | o    | o | +   | +     | o     |
| 193      | Procollagen type 1, alpha 1 (frag)            | 15214623         | 56,628          | 120   | 3        | o          | o   | o    | o    | o | +   | o     | o     |
| 194      | Procollagen type 1, alpha 2 (frag) (e)        | 16758080         | 129,486         | 135   | 4        | o          | o   | o    | o    | o | +   | o     | o     |
| 195      | Procollagen C protease                        | 9506953          | 50,153          | 355   | 17       | o          | o   | o    | o    | o | +   | o     | o     |
| 196      | Protein disulfide isomerase                   | 129731           | 56,916          | 680   | 45       | o          | o   | o    | o    | o | +   | o     | o     |
| 197      | Ser/Cys protease inhibitor F1                 | 29293811         | 46,436          | 596   | 23       | o          | o   | o    | o    | o | +   | o     | o     |
| A        | Bovine serum albumin                          | 76874            | 66,430          | 953   |          | o          | o   | o    | o    | o | +   | +     | +     |

**TABLE S2. SELECTED PROTEINS BY FUNCTION**

| <b>Chaperone/Redox</b>                    |                                       |                      |
|-------------------------------------------|---------------------------------------|----------------------|
| <b>Spot Number</b>                        | <b>Protein Name</b>                   | <b>Function</b>      |
| 2, 3, 4                                   | Macrophage inhibition factor $\beta$  | protein isomerase    |
| 9, 10                                     | Thioredoxin 1                         | oxyreductase         |
| 29                                        | Peptidyl proly isomerase              | isomerase            |
| 40, 44, 48, 53                            | Peroxiredoxin 2                       | oxyreductase         |
| 46                                        | Methylglyoxylase 1                    | detoxification       |
| 51                                        | P22 phox                              | regulation           |
| 54, 57, 65                                | GST Yfyf chain B                      | detoxification       |
| 55                                        | GST p2                                | detoxification       |
| 56                                        | Peroxiredoxin 6                       | oxyreductase         |
| 59                                        | Peroxiredoxin 3                       | oxyreductase         |
| 66                                        | Heat shock 27                         | protein binding      |
| 68, 72, 74, 166                           | ER protein 29                         | protein binding      |
| 73                                        | H58                                   | protein binding      |
| 86, 182                                   | Glucose regulated protein             | protein binding      |
| 134, 91                                   | HS70                                  | protein binding      |
| 152                                       | GST(b) p22                            | detoxification       |
| 156                                       | Thioredoxin reductase 1               | oxyreductase         |
| 162                                       | GST Yfyf chain A                      | detoxification       |
| 176, 177                                  | Alpha fetoprotein                     | antioxidant          |
| 183                                       | Heat shock 90                         | protein binding      |
| 196                                       | Protein disulfide isomerase           | oxyreductase         |
| <b>Cell-Cell Interaction</b>              |                                       |                      |
| <b>Spot Number</b>                        | <b>Protein Name</b>                   | <b>Function</b>      |
| 8                                         | Reticulon 4                           | adhesion             |
| 27, 28                                    | N-Cadherin-2                          | protein binding      |
| 31, 32, 36, 41, 42, 43                    | Tumor metastatic protein NM 23        | nucleotide binding   |
| 39                                        | Cyclophilin C                         | protein binding      |
| 47                                        | Heparin sulfate proteoglycan 2        | protein binding      |
| 63                                        | Pyrroline-5-carboxylate reductase     | reductase            |
| 87                                        | Fibrillin precursor                   | regulation           |
| 96, 97                                    | Procollagen XII alpha1                | protein binding      |
| 98, 107                                   | Alpha dystroglycan                    | protein binding      |
| 100, 188, 189, 190, 191, 194              | Procollagen 1alpha2                   | protein binding      |
| 114, 115                                  | Cathepsin-L                           | protease             |
| 116                                       | SPARC                                 | ion binding          |
| 126                                       | Pigment epithelial factor             | signalling           |
| 135, 136, 195                             | Procollagen C-protease                | protease             |
| 147, 76, 77, 82                           | 14-3-3 protein gamma                  | protein binding      |
| 149                                       | Glial maturation factor               | signalling           |
| 158                                       | F-Spondin                             | protein binding      |
| 180                                       | Procollagen 3alpha                    | protein binding      |
| 181                                       | Platelet activating factor            | acetyl reductase     |
| 185                                       | Follistatin-related protein           | carbohydrate binding |
| 193                                       | Procollagen 1alpha1                   | protein binding      |
| 197                                       | Serine/Cysteine protease inhibitor f1 | inhibitor            |
| <b>Carbohydrate/Amino Acid Metabolism</b> |                                       |                      |
| <b>Spot Number</b>                        | <b>Protein Name</b>                   | <b>Function</b>      |
| 62, 70, 146, 171                          | Triosephosphate isomerase             | isomerase            |
| 78                                        | Dimethyl arginine hydrolase           | hydrolase            |
| 101                                       | GAPDH                                 | dehydrogenase        |
| 102                                       | Aldose reductase                      | oxyreductase         |
| 103                                       | Malic dehydrogenase                   | dehydrogenase        |
| 104, 105, 106, 108, 109, 110              | LDH                                   | oxyreductase         |
| 111, 170                                  | Transaldolase                         | transferase          |
| 112, 113, 127, 128, 129, 130              | Enolase alpha                         | lyase                |

|          |                                |             |
|----------|--------------------------------|-------------|
| 119      | Phosphoglycerate kinase 1      | kinase      |
| 123, 124 | Creatine kinase                | transferase |
| 150      | Pyruvate kinase                | kinase      |
| 156      | Transketolase                  | transferase |
| 162      | Inositol phosphatase           | hydroxylase |
| 167      | Retinoblastoma binding protein | hydrolase   |
| 172      | Aldolase 3                     | lyase       |
| 173, 174 | Aspartate amino transferase    | transferase |

### ***Protein Metabolism***

| <b>Spot Number</b> | <b>Protein Name</b>            | <b>Function</b>    |
|--------------------|--------------------------------|--------------------|
| 1                  | Nedd 8                         | protein binding    |
| 7                  | Parathyrosin                   | co-activator       |
| 23                 | Ubiquitin-conjugating enzyme 2 | ligase             |
| 52                 | Proteasome beta 6              | peptidase          |
| 58                 | Proteasome beta 3              | peptidase          |
| 60                 | Proteasome alpha 5             | peptidase          |
| 61                 | Proteasome alpha 2             | peptidase          |
| 67                 | Ubiquitin hydrolase L1         | hydrolase          |
| 85                 | Proteasome alpha 7             | peptidase          |
| 131                | Calreticulin precursor         | protein binding    |
| 133                | Prolyl-4-hydroxylase beta      | hydroxylase        |
| 151                | Lamin receptor                 | structural         |
| 157                | Elongation factor 2            | nucleotide binding |
| 163                | Proteasome alpha 3             | peptidase          |
| 164                | Presenilin 2                   | protein binding    |
| 179                | Proteasome alpha 4             | peptidase          |
| 180                | Serine protease 27             | protease           |
| 184                | ER ATPase 1                    | hydroxylase        |

### ***Nucleotide Binding/Metabolism***

| <b>Spot Number</b> | <b>Protein Name</b>                     | <b>Function</b>      |
|--------------------|-----------------------------------------|----------------------|
| 14                 | Histidine triad nucleotide BP1          | hydroxylase          |
| 16                 | Histone H2A type 1                      | protein binding      |
| 22                 | Histone 2B                              | protein binding      |
| 25                 | Guanidine nucleotide binding protein 2  | protein binding      |
| 33                 | Expressed non-metastatic cell protein 1 | unknown              |
| 64                 | Rho GDP dissociation inhibitor          | protein binding      |
| 137                | Dihydropyrimidinase 3                   | hydrolase            |
| 139, 140, 143, 144 | Nucleobindin 1                          | nucleic acid binding |
| 168, 198           | GDP dissociation inhibitor 1            | enzyme regulation    |
| 178                | Dihydropyrimidinase 2                   | hydrolase            |

### ***Structural***

| <b>Spot Number</b> | <b>Protein Name</b>      | <b>Function</b> |
|--------------------|--------------------------|-----------------|
| 11, 21             | Coactosin-like protein 1 | cytoskeleton    |
| 13                 | Profilin 1               | cytoskeleton    |
| 17                 | Profilin 2               | cytoskeleton    |
| 34, 35             | Cofilin                  | cytoskeleton    |
| 37, 38             | Vimentin                 | cytoskeleton    |
| 120, 121, 122      | $\alpha$ -Actin          | cytoskeleton    |
| 154                | Tubulin $\alpha$ 3       | cytoskeleton    |
| 159                | $\beta$ -Actin           | cytoskeleton    |
| 186                | Nonmuscle tropomyosin    | cytoskeleton    |

### ***Lipid Metabolism***

| <b>Spot Number</b> | <b>Protein Name</b>                            | <b>Function</b> |
|--------------------|------------------------------------------------|-----------------|
| 15                 | Fatty acid binding protein                     | lipid binding   |
| 50                 | Huntingtin-interacting protein                 | transferase     |
| 165                | Phosphatidylinositol transfer protein $\alpha$ | lipid binding   |



### ***Neurotransmitter Metabolism***

| <b>Spot Number</b> | <b>Protein Name</b>      | <b>Function</b> |
|--------------------|--------------------------|-----------------|
| 5                  | Dopachrome decarboxylase | lyase           |
| 49                 | DJ1                      | protein binding |
| 75, 89, 90, 153    | Tyrosine hydroxylase     | oxygenase       |
